# Supplementary material
Source: HighWire-hosted journal article supplement (http://www.ghspjournal.org/highwire/filestream/2203/field_highwire_adjunct_files/4/17-00087-Srinivasan-Supplement5.pdf)
Supplement: 17-00087-Srinivasan-Supplement5.pdf [file 17-00087-Srinivasan-Supplement5.pdf]

**SUPPLEMENT 5. Project Management Information System**

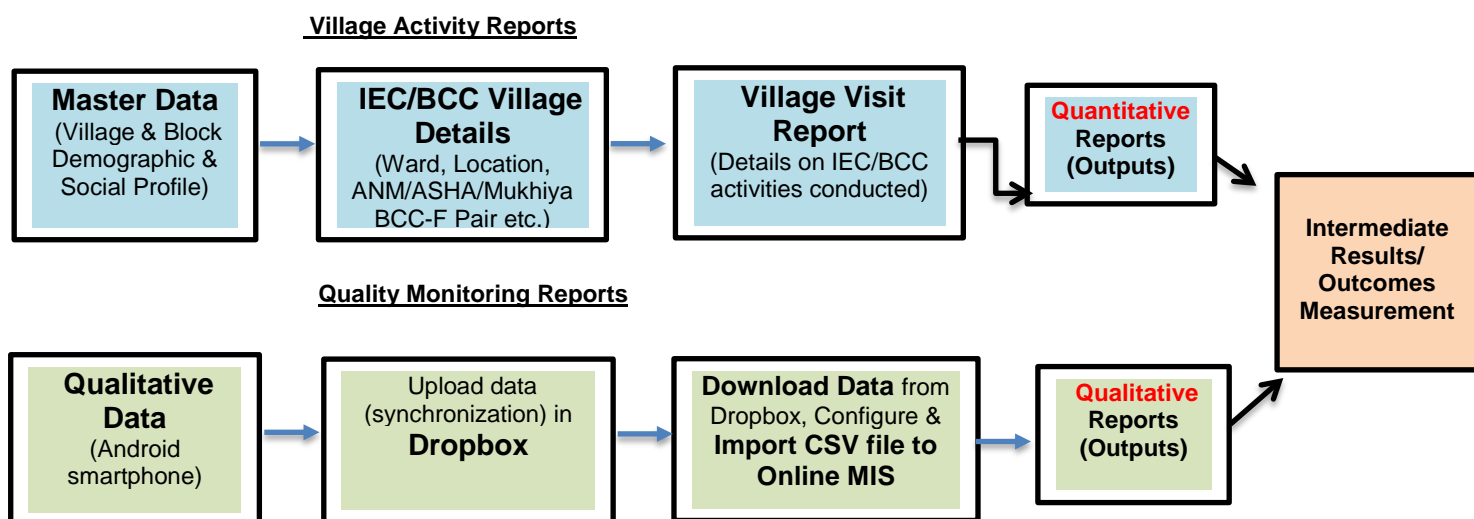

Abbreviations: ANM, auxiliary nurse-midwife; ASHA, accredited social health activist; BCC, behavior change communication; BCC-F, behavior change communication-facilitator; CSV, comma-separated values; IEC, information, education, and communication; MIS, management information system.
